# Supplementary material for: The effect of glucocorticoids on serum cystatin C in identifying acute kidney injury: a propensity-matched cohort study
Source: PubMed Central journal article supplement (PMC7694927; doi:10.1186/s12882-020-02165-1), 2020-11-27

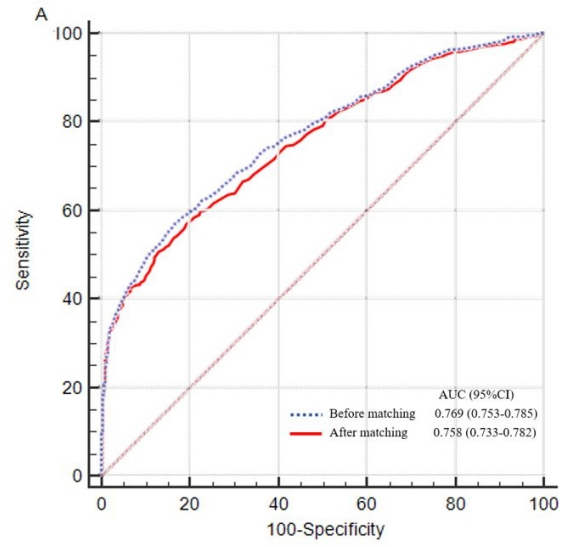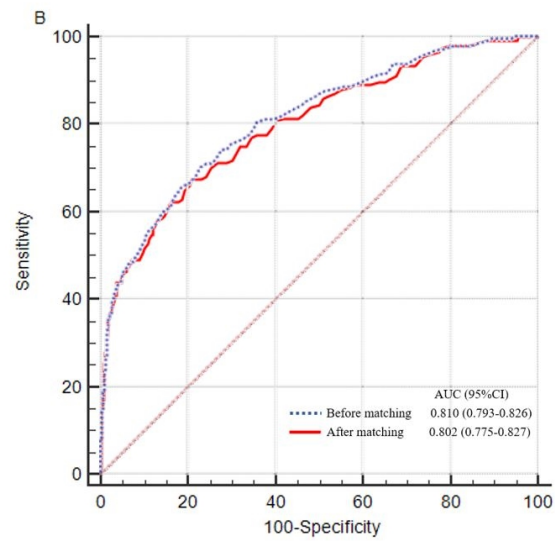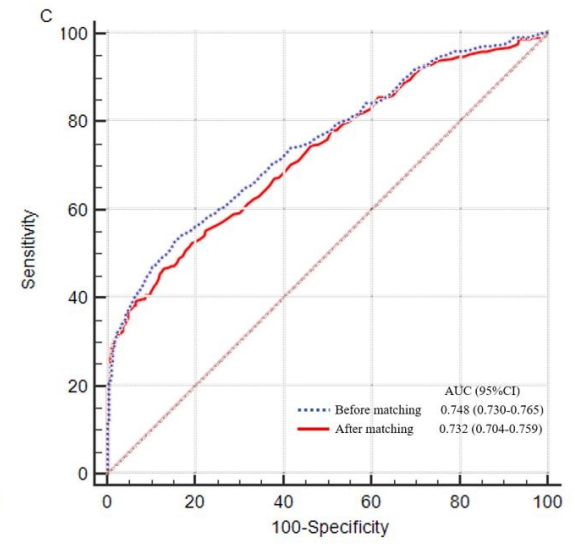

Supplement: 12882_2020_2165_MOESM1_ESM.pdf [file 12882_2020_2165_MOESM1_ESM.pdf]
